# Supplementary material for: Arf GTPase-Activating proteins ADAP1 and ARAP1 regulate incorporation of CD63 in multivesicular bodies
Source: PubMed Central journal article supplement (PMC11103404; doi:10.1242/bio.060338), 2024-05-10
Supplement: biolopen-13-060338-s1.pdf [file biolopen-13-060338-s1.pdf]

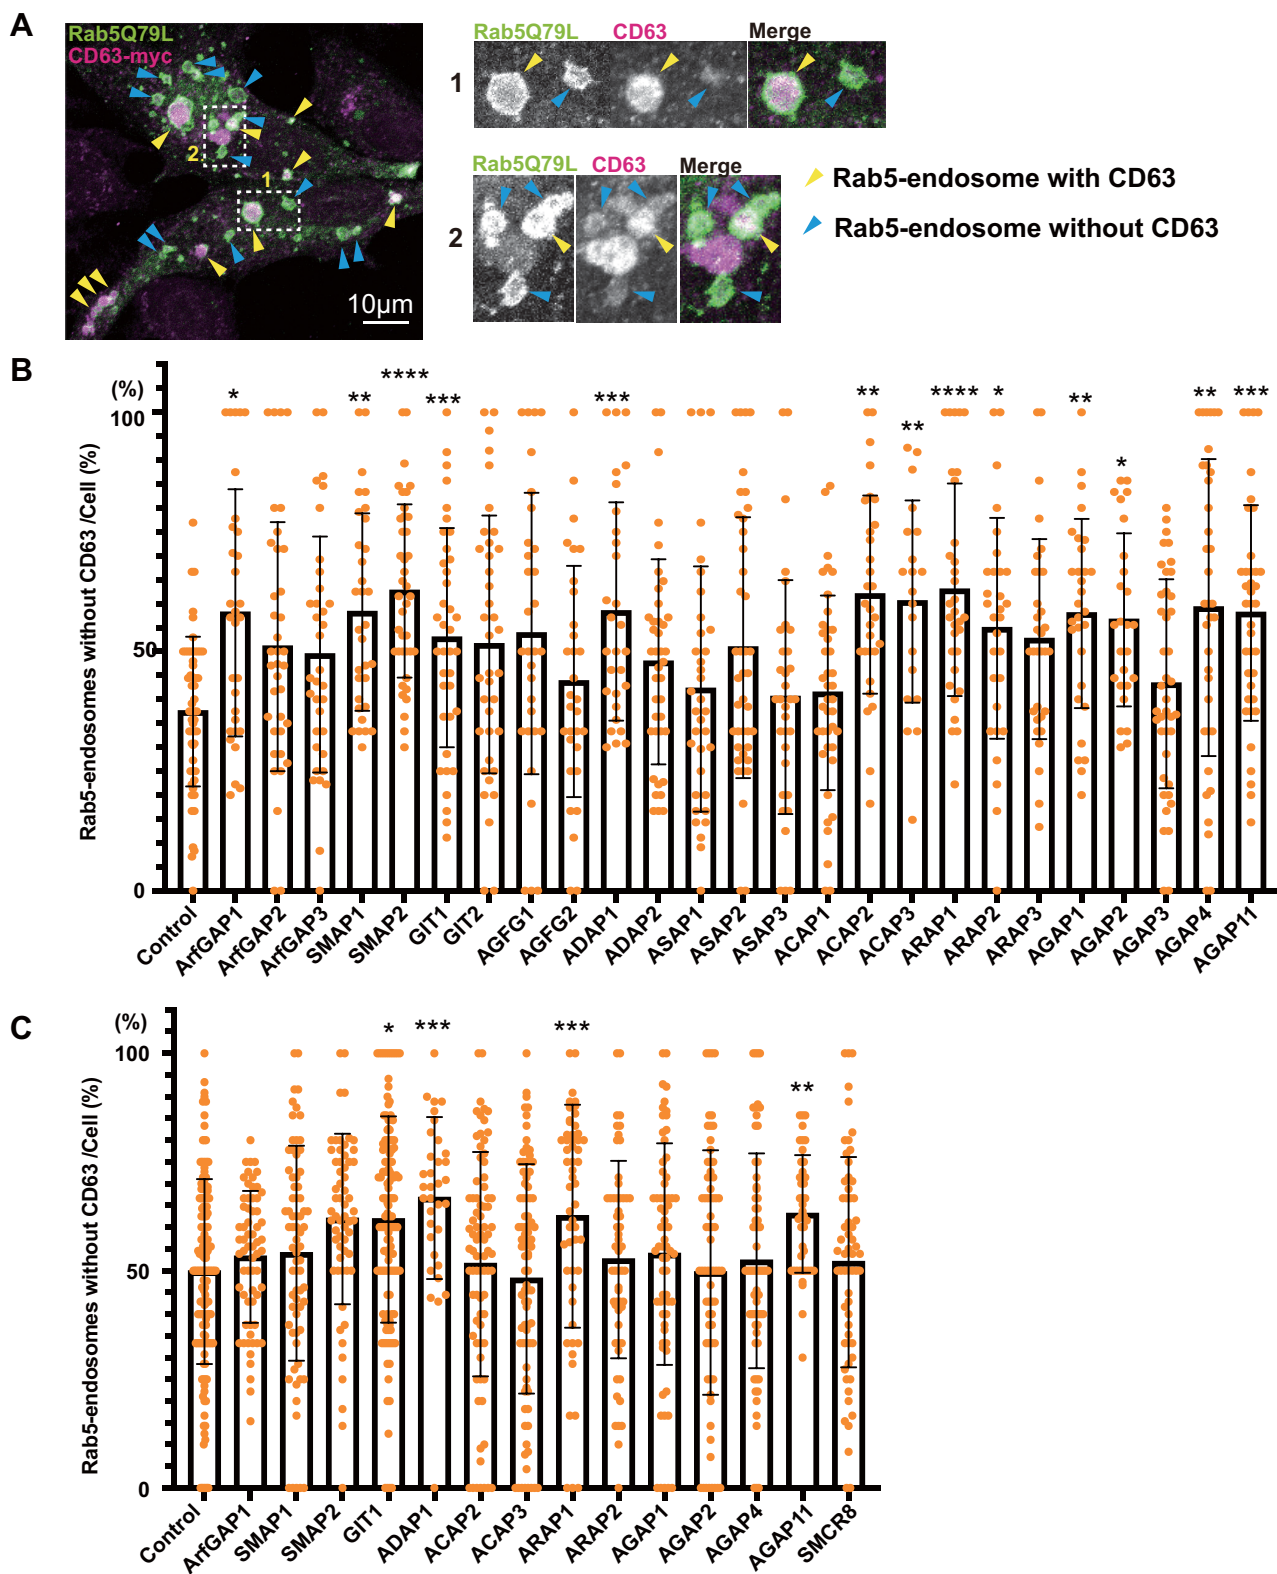

Fig. S1. Screening pf ArfGAPs for CD63 localization.

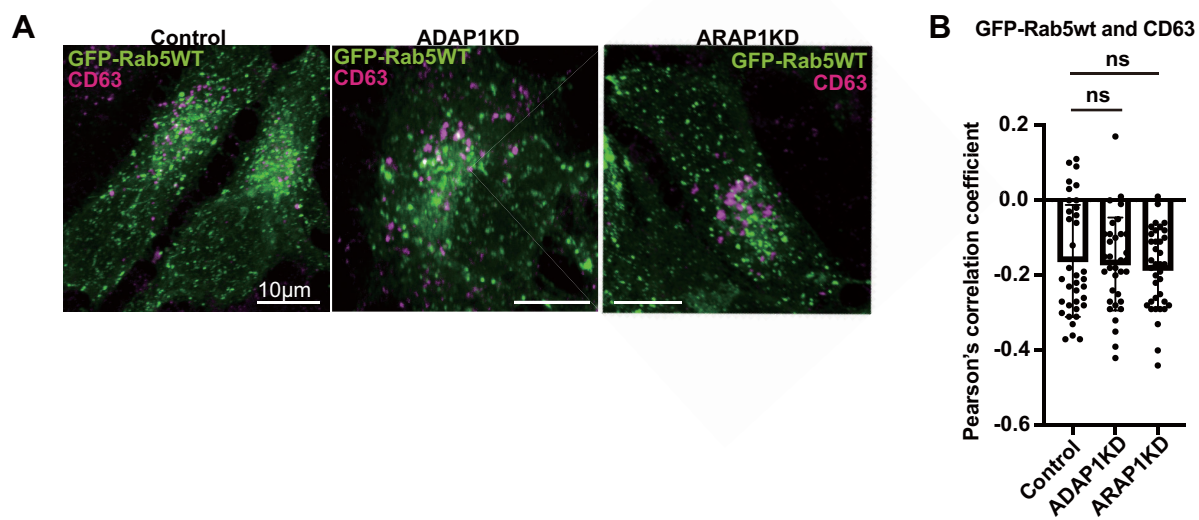

**Fig. S2.** Rab5WT overexpression does not induce enlarged endosomes.
